# Supplementary material for: Impact of Treatment with Antioxidants as an Adjuvant to Standard Therapy in Patients with Septic Shock: Analysis of the Correlation between Cytokine Storm and Oxidative Stress and Therapeutic Effects
Source: MDPI journal article supplement (doi:10.3390/ijms242316610), 2023-11-22
Supplement: s1 [file s1]

Supplement 2 The main signaling pathways activated during the development of septic shock, which can be triggered by the exposure to viral or bacterial infection. The renin–angiotensin system, the classic pathway of activation, and the lectin pathway are illustrated. The interleukins evaluated in this study are shown in red, and the possible interactions that may occur within these pathways are shown. The key clinical manifestations associated with organ damage are also depicted. In the renin-angiotensin system, in the presence of any infection (bacteria, fungi, or viruses), the ATIR receptor is activated, with a prooxidant response through ROS that triggers the NFkB transcription factor. Through second messengers, this factor participates in the transcription of inflammatory interleukins, which ends in a cytokine storm. This work shows an increase in interleukins (IL6, TNFa, IL1, IL8 and MCP1). The cytokine storm triggers the activation of macrophages and neutrophils, favoring ROS and NO accumulation. These mechanisms evolve to multiple organ failure in septic shock. The ATIR receptor in the cell membrane can also activate the ADAM17 protein, activating the TNF signaling pathway through TNFa and Jak1. These factors induce IL6 overexpression, generating a cytokine storm and leading to failure. Organic. The TLR2/4 membrane protein, which, through the NFkB transcription factor, activates the overexpression of TNFa, IL6, and IL1, and this cycle also ends in an increase in cytokines and organ failure in sepsis. The pathways that trigger dysregulated oxidant stress and inflammation converge through common signaling pathways. In red, we show the increased interleukins in this work, leading to organ failure.
