# Supplementary material for: Impact of Treatment with Antioxidants as an Adjuvant to Standard Therapy in Patients with Septic Shock: Analysis of the Correlation between Cytokine Storm and Oxidative Stress and Therapeutic Effects
Source: MDPI journal article supplement (doi:10.3390/ijms242316610), 2023-11-22
Supplement: s1 [file s1]

**Sequential Organ Failure Assessment (SOFA) between antioxidant treatment and control groups. Results of group analysis via one-way ANOVA and repeated measures between times is shown.**

|                              | Day 0    | Day 1      | Day2        | Day3        | Day 4       | Day 5   | Repeated measures p-value |
|------------------------------|----------|------------|-------------|-------------|-------------|---------|---------------------------|
| Vit C                        | 8 (6-9)  | 5 (4-10)   | 2 (2-9)     | 3.5 (2-6)   | 2.5 (1-5.5) | 3 (1-5) | 0.001                     |
| Vit E                        | 9 (7-12) | 8 (7-12)   | 7 (5-11)    | 6 (4-10)    | 5 (3-8)     | 5 (2-7) | 0.522                     |
| NAC                          | 7 (6-10) | 7.5 (7-10) | 7 (4.5-8.5) | 6 (3.5-8.5) | 5 (2-8)     | 4 (2-7) | 0.003                     |
| MT                           | 8 (6-10) | 7 (5-9)    | 7 (5-7)     | 4 (2-5)     | 4 (2-5)     | 2 (1-5) | 0.001                     |
| Control                      | 9 (7-11) | 9 (7-11)   | 7 (5-9)     | 7 (5-10)    | 6 (4-7.5)   | 6 (4-7) | 0.10                      |
| <b>One-way ANOVA p-value</b> | 0.287    | 0.053      | 0.179       | 0.023       | 0.04        | 0.01    |                           |

| Group   | Regression coefficient | SE.   | 95% CI           | p-value |
|---------|------------------------|-------|------------------|---------|
| Vit C   | -2.303                 | 0.430 | [-3.14- 1.4]     | 0.001   |
| Vit E   | -0.262                 | 0.409 | [-1.06 a 0.54]   | 0.522   |
| NAC     | -0.891                 | 0.419 | [-1.71 a -0.06]  | 0.003   |
| MT      | -1.745                 | 0.414 | [-2.55 a – 0.93] | 0.001   |
| Control | 0                      | Base  |                  |         |

Repeated-measures statistical analysis was used to analyze change over time by treatment group: SOFA (Sequential Organ Failure Assessment) score was assessed from day 0 to day 5 in each group and was analyzed using the marginal approximation model of the repeated-measures statistics. In the lower part of the table, the results of the marginal approximation regression model which obtain statistical significance are shown. Comparison between groups was performed using one-way ANOVA. Vit C: Vitamin C; Vit E: vitamin E; NAC: N-acetylcysteine; MT:melatonin; CI:confidence interval; SE= standard error
