# Supplementary material for: Impact of Treatment with Antioxidants as an Adjuvant to Standard Therapy in Patients with Septic Shock: Analysis of the Correlation between Cytokine Storm and Oxidative Stress and Therapeutic Effects
Source: MDPI journal article supplement (doi:10.3390/ijms242316610), 2023-11-22
Supplement: s1 [file s1]

| Definición detallada de los criterios de puntuación SOFA                                                                                                                   |           |              |                                                |                                                                    |                                                                  |
|----------------------------------------------------------------------------------------------------------------------------------------------------------------------------|-----------|--------------|------------------------------------------------|--------------------------------------------------------------------|------------------------------------------------------------------|
| Sistema                                                                                                                                                                    | 0         | 1            | 2                                              | 3                                                                  | 4                                                                |
| <b>Respiracion</b><br><b>PaO2/FiO2, mm Hg</b><br><b>(kPa)</b>                                                                                                              | ≥400      | < 400        | < 300                                          | <200 con<br>Apoyo respiratorio                                     | <100 con PaO2/FiO2,<br>mm Hg (kPa) apoyo<br>respiratorio         |
| <b>Coagulacion</b><br><b>Plaquetas, ×103</b><br><b>/μL</b>                                                                                                                 | ≥150      | < 150        | <100                                           | <50                                                                | <20                                                              |
| <b>Higado</b><br><b>Bilirubina,</b><br><b>mg/dL(μmol/L)</b>                                                                                                                | <1.2      | 1.2–1.9      | 2.0–5.9                                        | 6.0–11.9                                                           | >12.0                                                            |
| <b>Cardiovascular</b><br><b>Presion media</b><br><b>arterial (PAM)</b><br><b>(mm Hg)</b>                                                                                   | ≥ 70mm Hg | < 70mm<br>Hg | Dopamine <<br>5 or<br>dobutamine<br>(any dose) | Dopamine 5.1–15 or<br>epinephrine ≤ 0.1 or<br>norepinephrine ≤ 0.1 | Dopamine > 15 or<br>epinephrine > 0.1 or<br>norepinephrine > 0.1 |
| <b>Sistema nervioso</b><br><b>central</b><br><b>Glasgow</b>                                                                                                                | 15        | 13-14        | 10-12                                          | 6-9                                                                | <6                                                               |
| <b>Renal</b><br><b>Creatinina, mg/dL</b><br><b>(μmol/ L)</b>                                                                                                               | <1.2      | 1.2–1.9      | 2.0–3.4                                        | 3.5–4.9                                                            | >5.0                                                             |
| <b>Urine output, mL/d</b>                                                                                                                                                  |           |              |                                                | <500                                                               | <200                                                             |
| <b>SOFA = sequential organ failure assessment</b>                                                                                                                          |           |              |                                                |                                                                    |                                                                  |
| <b>Interpretación del pronóstico de mortalidad según el Score: de 0-1 Mortalidad (0%), 2-3, (6.4%), 4-5 (20.2%), 6-7 (21.5%), 8-9 (33.3 %), 10-11 (50%), 12-14 (95.2%)</b> |           |              |                                                |                                                                    |                                                                  |
