# Supplementary figures and images for: Impact of Treatment with Antioxidants as an Adjuvant to Standard Therapy in Patients with Septic Shock: Analysis of the Correlation between Cytokine Storm and Oxidative Stress and Therapeutic Effects
Source: MDPI journal article supplement (doi:10.3390/ijms242316610), 2023-11-22

**Supplement 1. Screening, Randomization and Outcomes.**

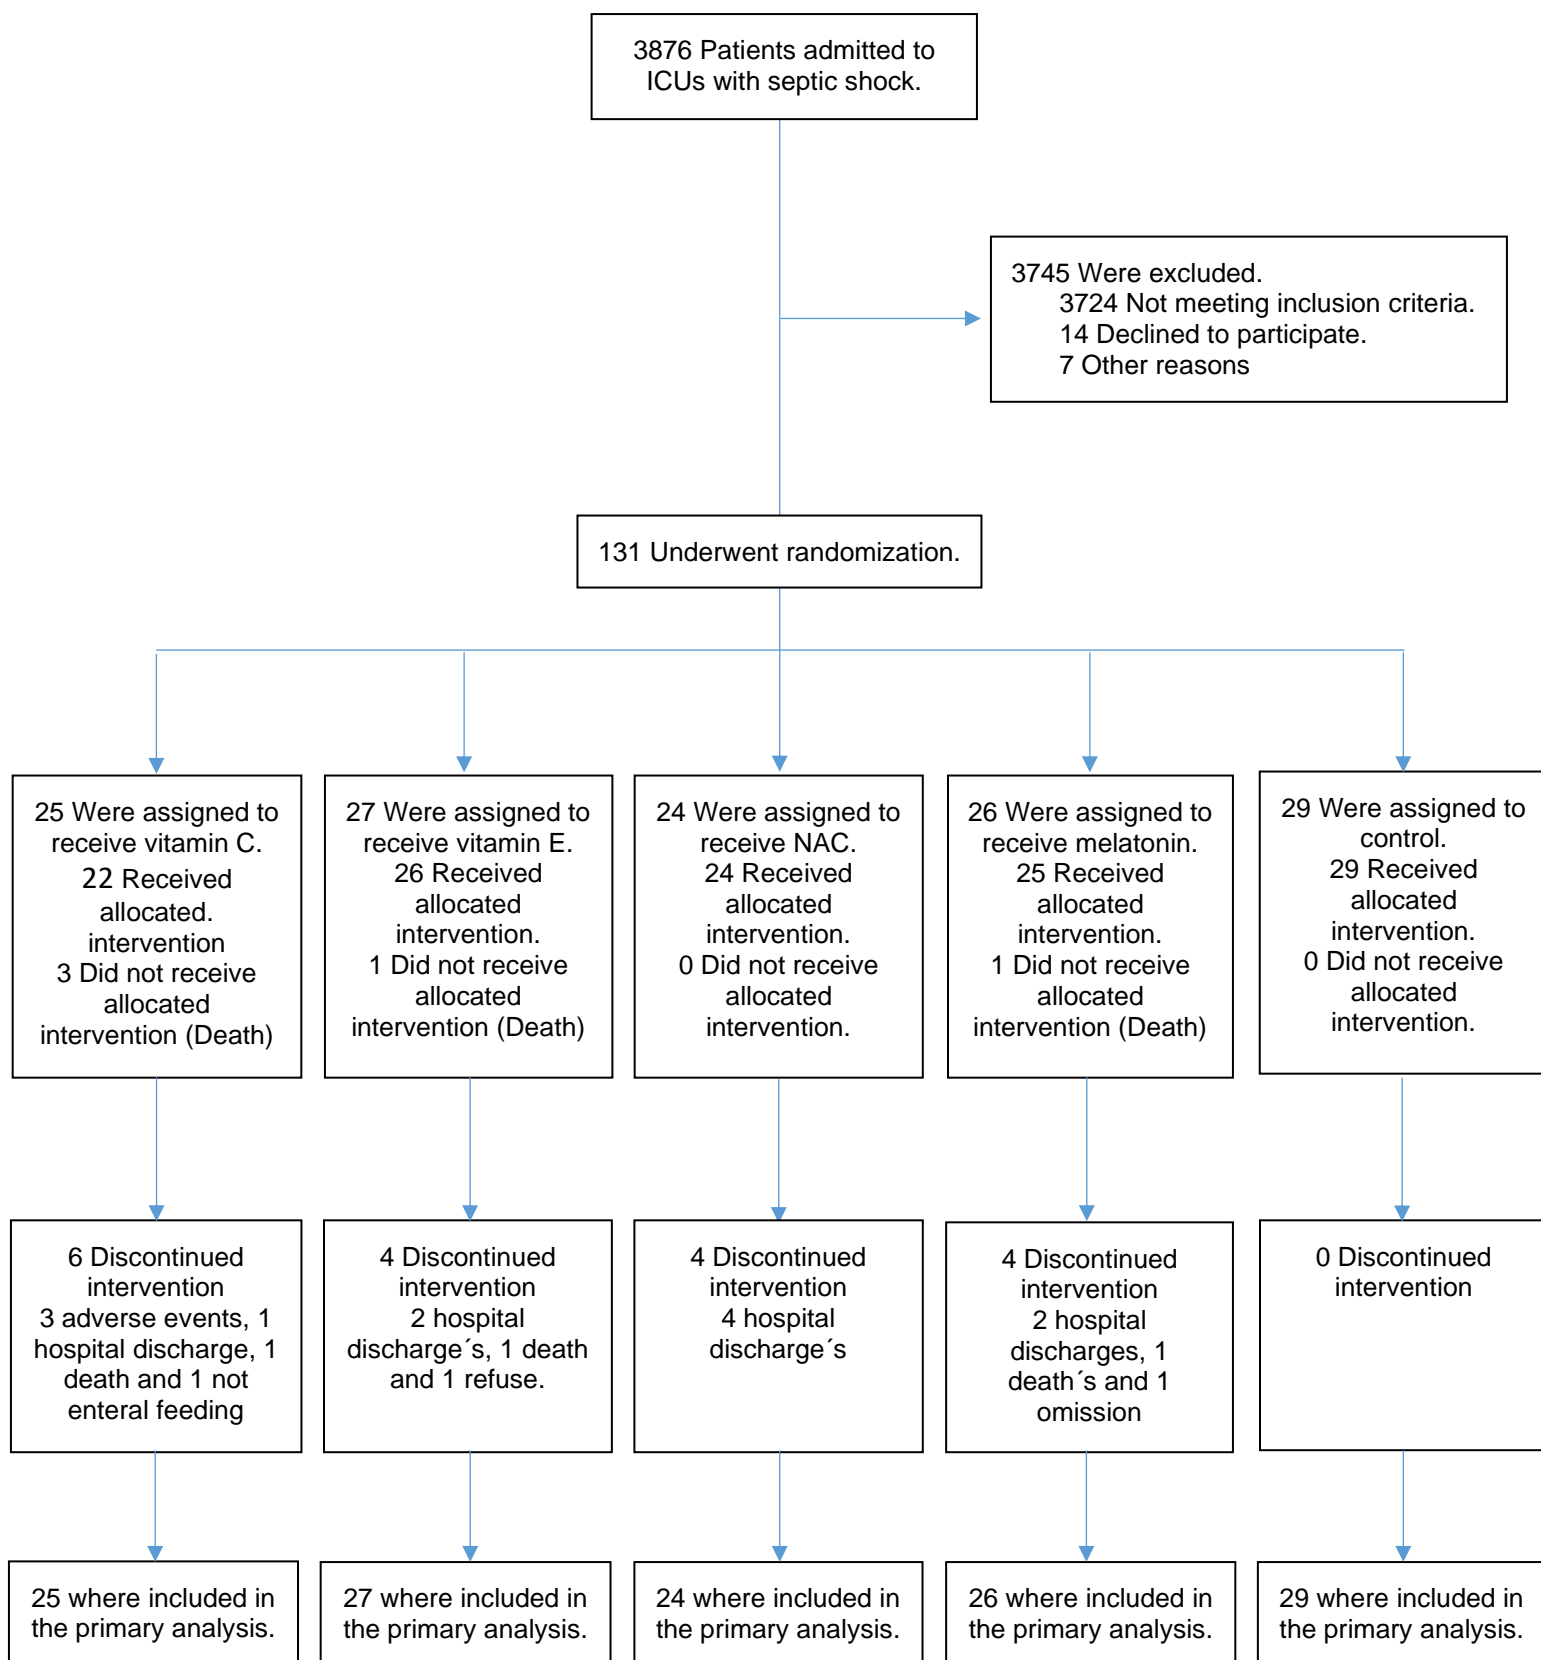

Supplement: s1 [file s1]
